# Supplementary material
Source: publisher site journal article supplement (https://www.spandidos-publications.com/2747/downloadSupplementary)
Supplement: Supplementary file 1 [file downloadSupplementary]

## Sheet: Sheet1
Table SV. Gene name table.
Gene names	Uniprot Entry names	Protein names
A2M	P06238	Alpha-2-macroglobulin (Alpha-2-M)
ABR	A0A0G2JTR4	Active breakpoint cluster region-related protein
CRYAB	P23928	Alpha-crystallin B chain (Alpha(B)-crystallin)
DGKG	P49620	Diacylglycerol kinase gamma (DAG kinase gamma) (EC 2.7.1.107) (88 kDa diacylglycerol kinase) (DGK-III) (Diglyceride kinase gamma) (DGK-gamma)
DVL1	Q9WVB9	Segment polarity protein dishevelled homolog DVL-1 (Dishevelled-1) (DSH homolog 1)
DYRK1A	Q63470	Dual specificity tyrosine-phosphorylation-regulated kinase 1A (EC 2.7.12.1) (Dual specificity YAK1-related kinase) (Protein kinase minibrain homolog) (MNBH) (RP86)
KIDINS220	A0A0H4SRI2	Kinase D-interacting substrate 220 isoform 1
KPNA1	P83953	Importin subunit alpha-5 (Importin alpha-5) (Karyopherin subunit alpha-1)
LAMA1	D4A409	Laminin subunit alpha 1 (Laminin, alpha 1)
MAPRE1	Q66HR2	Microtubule-associated protein RP/EB family member 1 (APC-binding protein EB1) (End-binding protein 1) (EB1)
MYO1B	Q05096	Unconventional myosin-Ib (Myosin I alpha) (MMI-alpha) (MMIa) (Myosin heavy chain myr 1)
PCLO	F1M7V4	Protein piccolo
PFDN1	D3ZX38	Prefoldin 1 (Predicted) (Prefoldin subunit 1)
POMC	Q8K422	Adrenocorticotropic hormone (Beta-LPH) (Beta-endorphin) (Corticotropin) (Corticotropin-like intermediary peptide) (Corticotropin-lipotropin) (Gamma-LPH) (Gamma-MSH) (Lipotropin beta) (Lipotropin gamma) (Melanocyte-stimulating hormone alpha) (Melanocyte-stimulating hormone beta) (Melanotropin alpha) (Melanotropin beta) (Melanotropin gamma) (Met-enkephalin) (NPP) (Pro-opiomelanocortin)
RAB10	Q5RKJ9	RAB10, member RAS oncogene family (RAB10, member RAS oncogene family, isoform CRA_a) (Ras-related protein Rab-10)
RAB23	D3ZRM5	RAB23, member RAS oncogene family (RAB23, member RAS oncogene family (Predicted))
RAB33A	D3ZCU8	RAB33A, member RAS oncogene family (RAB33A, member of RAS oncogene family (Predicted))
RANBP10	D3Z7Z5	RAN-binding protein 10
RFX2	A0A0G2K7V5	DNA-binding protein RFX2
SEC61A1	P61621	Protein transport protein Sec61 subunit alpha isoform 1 (Sec61 alpha-1)
SNX1	Q99N27	Sorting nexin-1
SQSTM1	O08623	Sequestosome-1 (Protein kinase C-zeta-interacting protein) (PKC-zeta-interacting protein) (Ubiquitin-binding protein p62)
ASPA	Q9R1T5	Aspartoacylase (EC 3.5.1.15) (Aminoacylase-2) (ACY-2)
FNTA	Q5RKJ4	Farnesyltransferase, CAAX box, alpha (Farnesyltransferase, CAAX box, alpha, isoform CRA_b) (Protein farnesyltransferase/geranylgeranyltransferase type-1 subunit alpha)
KCNJ10	P49655	ATP-sensitive inward rectifier potassium channel 10 (ATP-sensitive inward rectifier potassium channel KAB-2) (BIR10) (Brain-specific inwardly rectifying K(+) channel 1) (BIRK1) (Inward rectifier K(+) channel Kir4.1) (Potassium channel, inwardly rectifying subfamily J member 10)
ACSL4	O35547	Long-chain-fatty-acid--CoA ligase 4 (EC 6.2.1.3) (Arachidonate--CoA ligase) (EC 6.2.1.15) (Long-chain acyl-CoA synthetase 4) (LACS 4)
EFTUD2	F1LM66	116 kDa U5 small nuclear ribonucleoprotein component (U5 snRNP-specific protein, 116 kDa)
EIF3K	A0A0G2JU77	Eukaryotic translation initiation factor 3 subunit K (eIF3k) (Eukaryotic translation initiation factor 3 subunit 12) (eIF-3 p25)
HMG20A	D3Z937	High mobility group 20A (High mobility group 20A (Predicted))
ITM2B	Q5XIE8	Integral membrane protein 2B (Immature BRI2) (imBRI2) (Transmembrane protein BRI) (Bri) [Cleaved into: BRI2, membrane form (Mature BRI2) (mBRI2); BRI2 intracellular domain (BRI2 ICD); BRI2C, soluble form; Bri23 peptide (Bri2-23) (ABri23) (C-terminal peptide) (P23 peptide)]
KCNJ16	P52191	Inward rectifier potassium channel 16 (BIR9) (Inward rectifier K(+) channel Kir5.1) (Potassium channel, inwardly rectifying subfamily J member 16)
MYL9	B0BMS8	Myl9 protein (Myosin regulatory light polypeptide 9) (Myosin, light polypeptide 9, regulatory (Predicted))
NDUFAF4	Q9NQR8	NADH dehydrogenase [ubiquinone] 1 alpha subcomplex assembly factor 4 (Hormone-regulated proliferation-associated protein of 20 kDa homolog) (Protein HRPAP20)
PTPN9	Q641Z2	Tyrosine-protein phosphatase non-receptor type 9 (EC 3.1.3.48)
RAB30	A0A0G2JTT4	RAB30, member RAS oncogene family (RAB30, member RAS oncogene family, isoform CRA_a)
RAB39A	D3ZZP2	RAB39, member RAS oncogene family (Predicted) (RAB39A, member RAS oncogene family)
SNTB2	D3ZMX6	Syntrophin, beta 2
SRP72	Q32PZ7	Signal recognition particle subunit SRP72 (Fragment)
SYT12	P97610	Synaptotagmin-12 (Synaptotagmin XII) (SytXII) (Synaptotagmin-related gene 1 protein) (Srg1)
UQCRQ	Q7TQ16	Cytochrome b-c1 complex subunit 8 (Complex III subunit 8) (Complex III subunit VIII) (Low molecular mass ubiquinone-binding protein) (Ubiquinol-cytochrome c reductase complex 9.5 kDa protein) (Ubiquinol-cytochrome c reductase complex ubiquinone-binding protein QP-C)
USP4	B2GUZ1	Ubiquitin carboxyl-terminal hydrolase 4 (EC 3.4.19.12) (Deubiquitinating enzyme 4) (Ubiquitin thioesterase 4) (Ubiquitin-specific-processing protease 4)
APOH	Q5I0M1	Apolipoprotein H (Beta-2-glycoprotein 1) (Beta-2-glycoprotein I)
ARF3	A0A0G2K9H8	ADP-ribosylation factor 3
ARFGEF2	Q7TSU1	Brefeldin A-inhibited guanine nucleotide-exchange protein 2 (Brefeldin A-inhibited GEP 2) (ADP-ribosylation factor guanine nucleotide-exchange factor 2)
BEX1	Q3MKQ2	Protein BEX1 (Brain-expressed X-linked protein 1 homolog) (EG2RVC)
GABRB1	P15431	Gamma-aminobutyric acid receptor subunit beta-1 (GABA(A) receptor subunit beta-1)
ISCU	B2RZ79	Iron-sulfur cluster assembly enzyme (Iron-sulfur cluster scaffold homolog (E. coli)) (Similar to nitrogen fixation cluster-like (Predicted), isoform CRA_b)
LRP	Q03348	Receptor-type tyrosine-protein phosphatase alpha (Protein-tyrosine phosphatase alpha) (R-PTP-alpha) (EC 3.1.3.48)
MAGI2	O88382	Membrane-associated guanylate kinase, WW and PDZ domain-containing protein 2 (Atrophin-1-interacting protein 1) (AIP-1) (Membrane-associated guanylate kinase inverted 2) (MAGI-2) (Synaptic-scaffolding molecule) (S-SCAM)
MTOR	P42346	Serine/threonine-protein kinase mTOR (EC 2.7.11.1) (FK506-binding protein 12-rapamycin complex-associated protein 1) (FKBP12-rapamycin complex-associated protein) (Mammalian target of rapamycin) (mTOR) (Mechanistic target of rapamycin) (Rapamycin target protein 1) (RAPT1)
NUB1	Q5XIT4	Negative regulator of ubiquitin-like proteins 1
PDE4B	P14646	cAMP-specific 3',5'-cyclic phosphodiesterase 4B (EC 3.1.4.53) (DPDE4)
PLD3	Q5FVH2	5'-3' exonuclease PLD3 (EC 3.1.16.1) (Choline phosphatase 3) (Phosphatidylcholine-hydrolyzing phospholipase D3) (Phospholipase D3) (PLD 3)
PPP2R2D	A0A0G2JSQ0	Serine/threonine-protein phosphatase 2A 55 kDa regulatory subunit B
PPP2R5E	A0A0G2JTA1	Serine/threonine-protein phosphatase 2A 56 kDa regulatory subunit
SLC13A5	A0A0H2UHM2	Solute carrier family 13 member 5
SLC30A1	Q62720	Zinc transporter 1 (ZnT-1) (Solute carrier family 30 member 1)
STRN	G3V6L8	RCG61894, isoform CRA_a (Striatin)
TOM1	Q5XI21	Target of myb1 homolog (Chicken) (Target of myb1 membrane-trafficking protein)
CRTC1	Q157S1	CREB-regulated transcription coactivator 1 (Mucoepidermoid carcinoma translocated protein 1 homolog) (Transducer of regulated cAMP response element-binding protein 1) (TORC-1) (Transducer of CREB protein 1)
PRKKA	P54645	5'-AMP-activated protein kinase catalytic subunit alpha-1 (AMPK subunit alpha-1) (EC 2.7.11.1) (Acetyl-CoA carboxylase kinase) (ACACA kinase) (EC 2.7.11.27) (Hydroxymethylglutaryl-CoA reductase kinase) (HMGCR kinase) (EC 2.7.11.31) (Tau-protein kinase PRKAA1) (EC 2.7.11.26)
